# Supplementary material for: NMR-Verified Dearomatization of 5,7-Substituted Pyrazolo[1,5-a]pyrimidines
Source: MDPI journal article supplement (doi:10.3390/molecules28186584), 2023-09-12
Supplement: s1 [file s1]

# Supplementary Materials

## NMR-Verified Dearomatization of 5,7-Substituted Pyrazolo[1,5-a]pyrimidines

Daria Novikova <sup>1,\*</sup>, Ammar Al Mustafa <sup>1</sup>, Tatyana Grigoreva <sup>1</sup>, Svetlana Vorona <sup>1</sup>, Stanislav Selivanov <sup>2,3</sup>  
and Vyacheslav Tribulovich <sup>1,\*</sup>

<sup>1</sup> Laboratory of Molecular Pharmacology, St. Petersburg State Institute of Technology,  
St. Petersburg 190013, Russia; ammar.almus@hotmail.com (A.A.M.); rozentatiana@gmail.com (T.G.);  
s.vorona@bk.ru (S.V.)

<sup>2</sup> Laboratory of Biomolecular NMR, St. Petersburg State University, St. Petersburg 199034, Russia;  
nmr.group.spbu@gmail.com

<sup>3</sup> Department of Organic Chemistry, St. Petersburg State Institute of Technology,  
St. Petersburg 190013, Russia

\* Correspondence: dc.novikova@gmail.com (D.N.); tribulovich@gmail.com (V.T.)

**Table S1.** Experimental (NOE) and calculated distance values (Å) for **6b** (SYN).

| N  | H <sub>i</sub> –H <sub>j</sub>                                   | S <sub>ij</sub> /S <sub>ii</sub> | r <sub>exp</sub> <sup>a</sup> , Å | r <sub>exp</sub> <sup>b</sup> , Å | r <sub>exp</sub> <sup>c</sup> , Å | r <sub>calc</sub> , Å | Δr/r <sup>a</sup> , % | Δr/r <sup>b</sup> , % | Δr/r <sup>c</sup> , % |
|----|------------------------------------------------------------------|----------------------------------|-----------------------------------|-----------------------------------|-----------------------------------|-----------------------|-----------------------|-----------------------|-----------------------|
| 1  | H <sup>6</sup> <sub>α(ax)</sub> –H <sup>6</sup> <sub>β(eq)</sub> | 15.5                             | 1.77                              | 1.75                              | 1.75                              | 1.77                  | 0                     | -1.13                 | -1.13                 |
| 2  | H <sup>6</sup> <sub>α(ax)</sub> –H <sup>5</sup>                  | 0.58                             | 3.06                              | 3.02                              | 3.04                              | 3.06                  | 0                     | -1.31                 | -0.65                 |
| 3  | H <sup>6</sup> <sub>α(ax)</sub> –H <sup>7</sup>                  | 0.54                             | 3.10                              | 3.06                              | 3.08                              | 3.06                  | 1.31                  | 0                     | 0.65                  |
| 4  | H <sup>6</sup> <sub>β(eq)</sub> –H <sup>5</sup>                  | 2.32                             | 2.39                              | 2.40                              | 2.40                              | 2.48                  | -3.63                 | -3.23                 | -3.23                 |
| 5  | H <sup>6</sup> <sub>β(eq)</sub> –H <sup>7</sup>                  | 2.40                             | 2.37                              | 2.39                              | 2.39                              | 2.43                  | -2.47                 | -1.65                 | -1.65                 |
| 6  | H <sup>2</sup> –H <sup>4</sup>                                   | 0.04                             | 4.78                              | 4.72                              | 4.91                              | 4.95                  | -3.43                 | -4.65                 | -0.81                 |
| 7  | H <sup>2</sup> –H <sup>5</sup>                                   | 0.014                            | 5.69                              | 5.62                              | 5.90                              | 5.85                  | -2.73                 | -3.93                 | 0.85                  |
| 8  | H <sup>2</sup> –H <sup>6</sup> <sub>β(eq)</sub>                  | 0.01                             | 6.02                              | 5.95                              | 6.54                              | 6.54                  | -7.95                 | -9.02                 | 0                     |
| 9  | H <sup>4</sup> –H <sup>5</sup>                                   | 1.87                             | 2.52                              | 2.49                              | 2.49                              | 2.56                  | -1.56                 | -2.73                 | -2.73                 |
| 10 | H <sup>4</sup> –H <sup>6</sup> <sub>β(eq)</sub>                  | 0.104                            | 4.07                              | 4.03                              | 4.23                              | 4.25                  | -4.24                 | -5.18                 | -0.47                 |
| 11 | H <sup>5</sup> –H <sup>7</sup>                                   | 1.17                             | 2.72                              | 2.69                              | 2.69                              | 2.69                  | 1.12                  | 0                     | 0                     |

<sup>a</sup>—the reference distance r(H<sup>6</sup><sub>α</sub>–H<sup>6</sup><sub>β</sub>); <sup>b</sup>—the reference distance r(H<sup>5</sup>–H<sup>7</sup>); <sup>c</sup>—the reference distance r(H<sup>5</sup>–H<sup>7</sup>) with a correction for diffusion anisotropy.

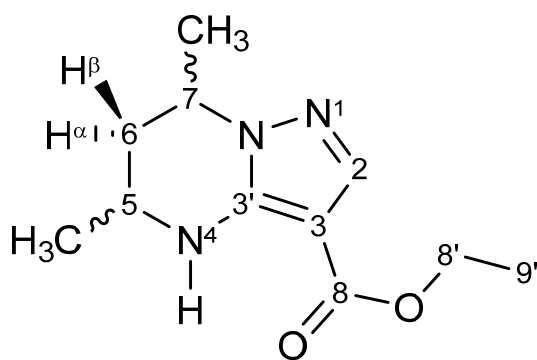**Figure S1.** The structure of the 5,7-dimethyl-4,5,6,7-tetrahydropyrazolo[1,5-a]pyrimidine-3-carboxylate molecule with atom numbering.

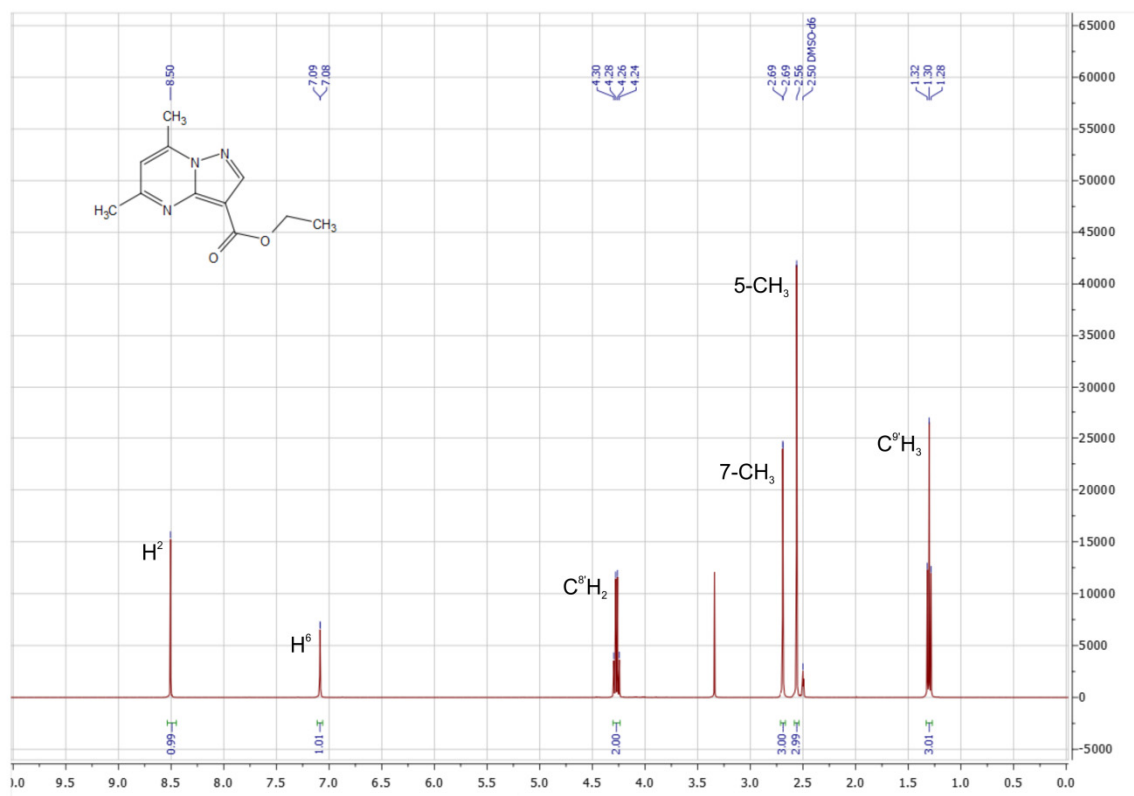

Figure S2. <sup>1</sup>H NMR spectrum of 4b.

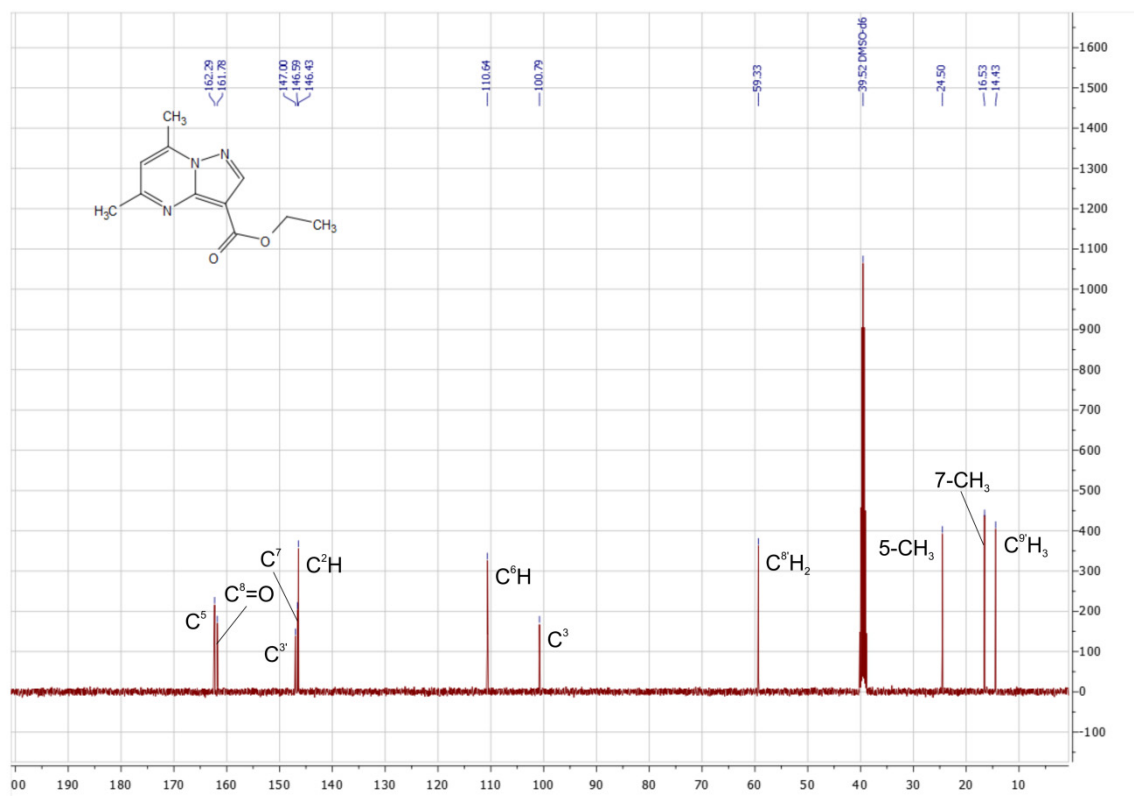

Figure S3. <sup>13</sup>C NMR spectrum of 4b.

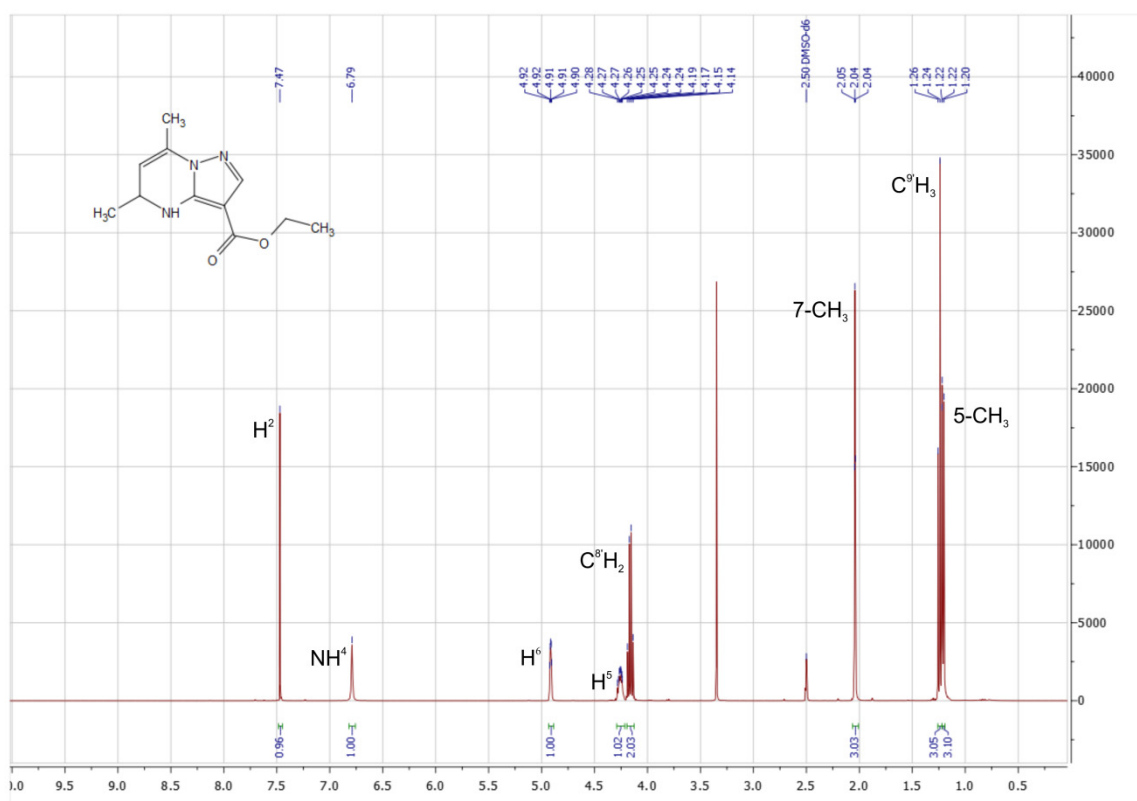

Figure S4. <sup>1</sup>H NMR spectrum of 5b.

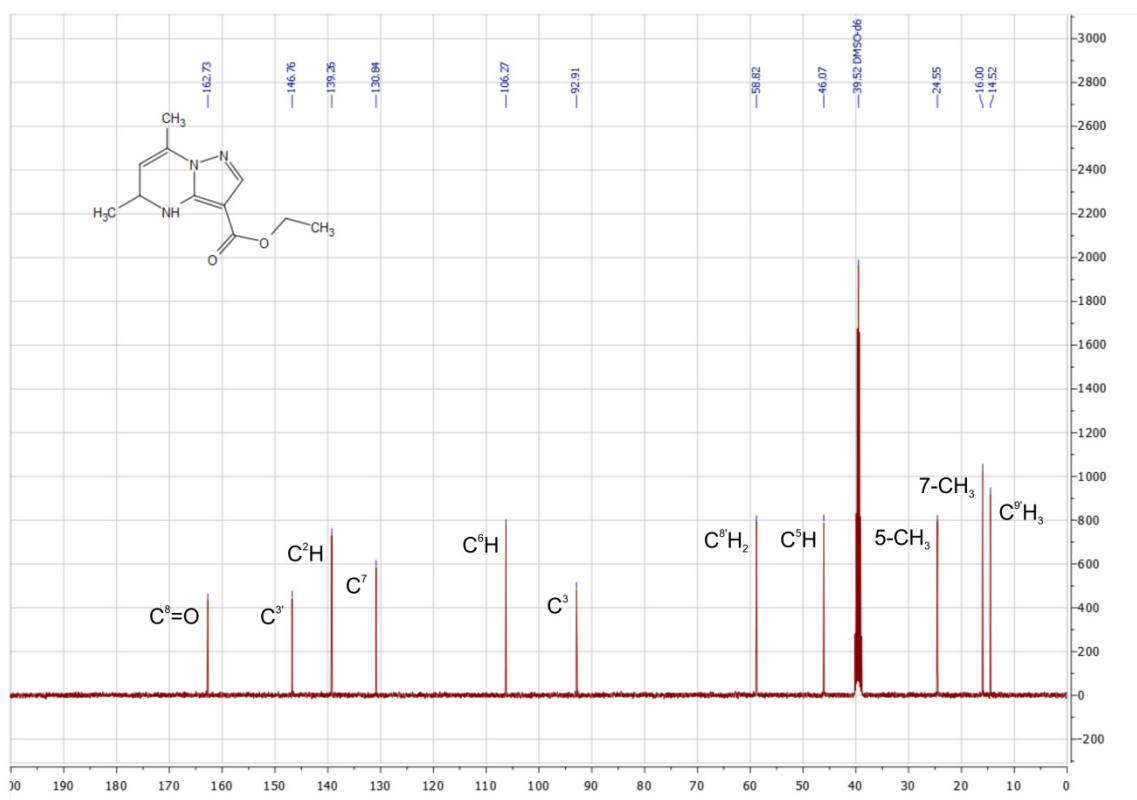

Figure S5. <sup>13</sup>C NMR spectrum of 5b.

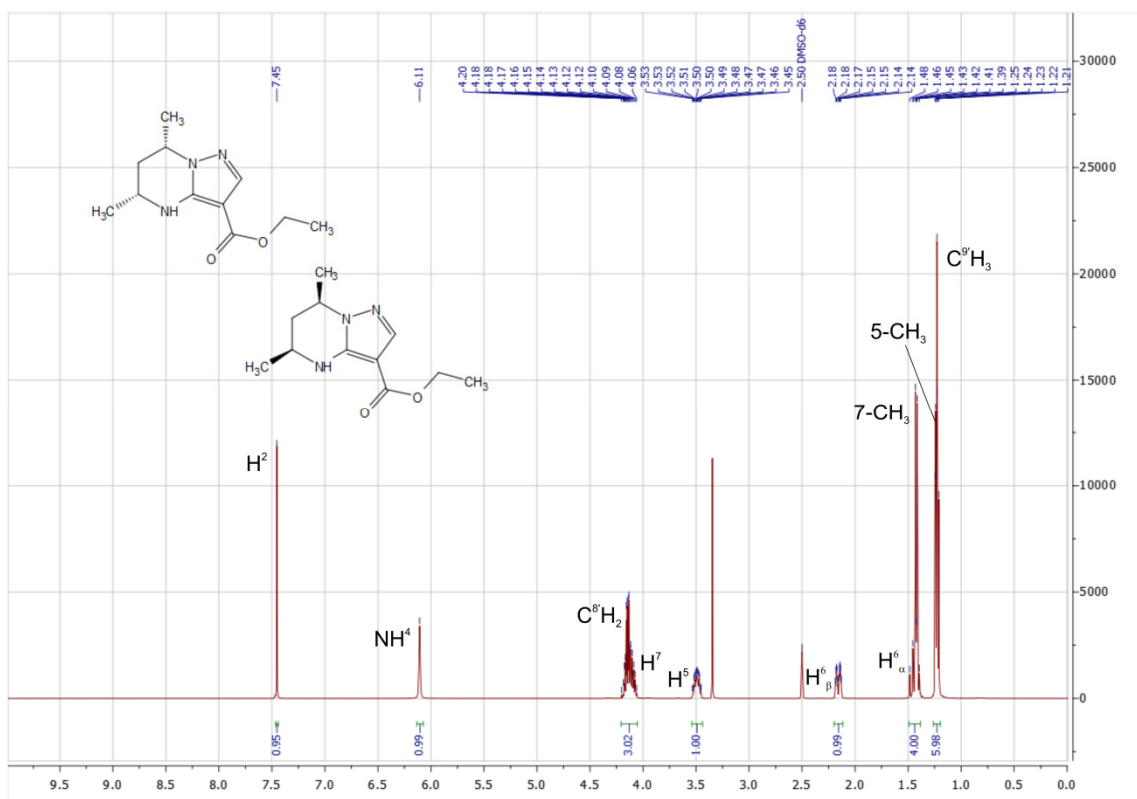

Figure S6.  $^1\text{H}$  NMR spectrum of **6b** (SYN).

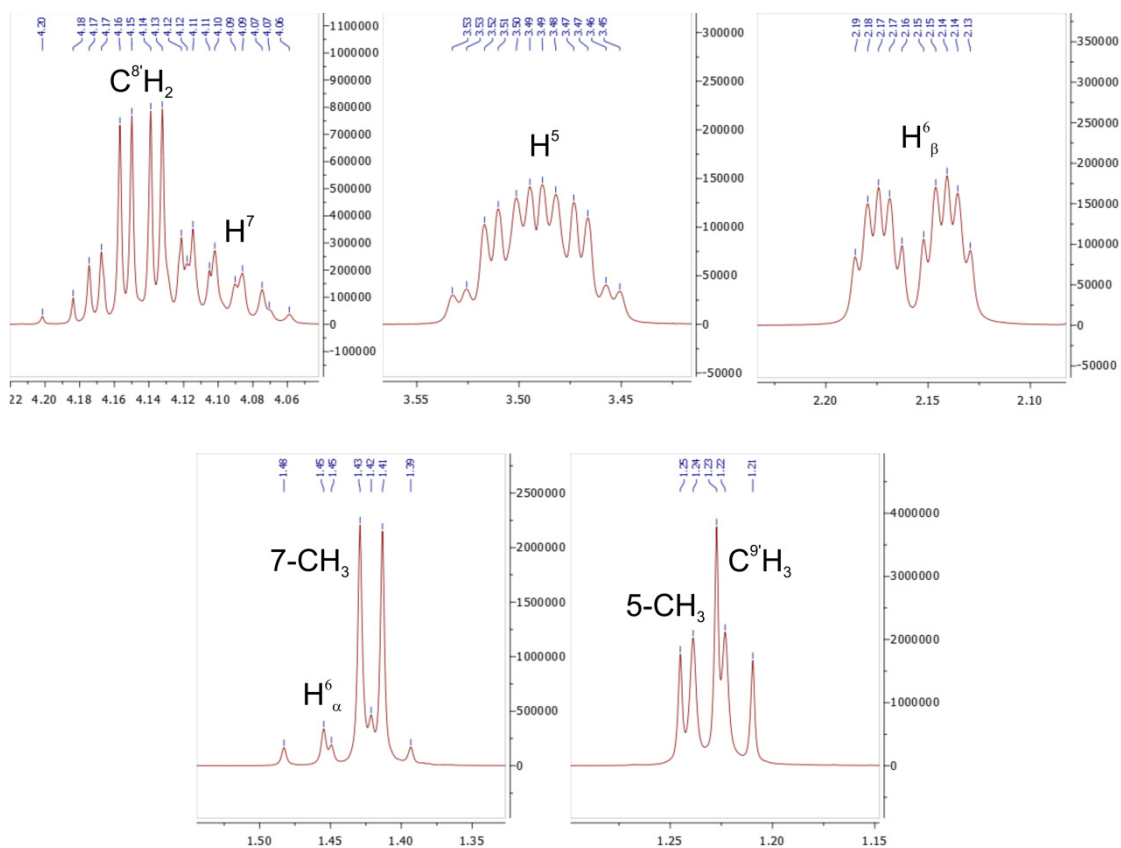

Figure S7. Magnified non-singlet signals in  $^1\text{H}$  NMR spectrum of **6b** (SYN).

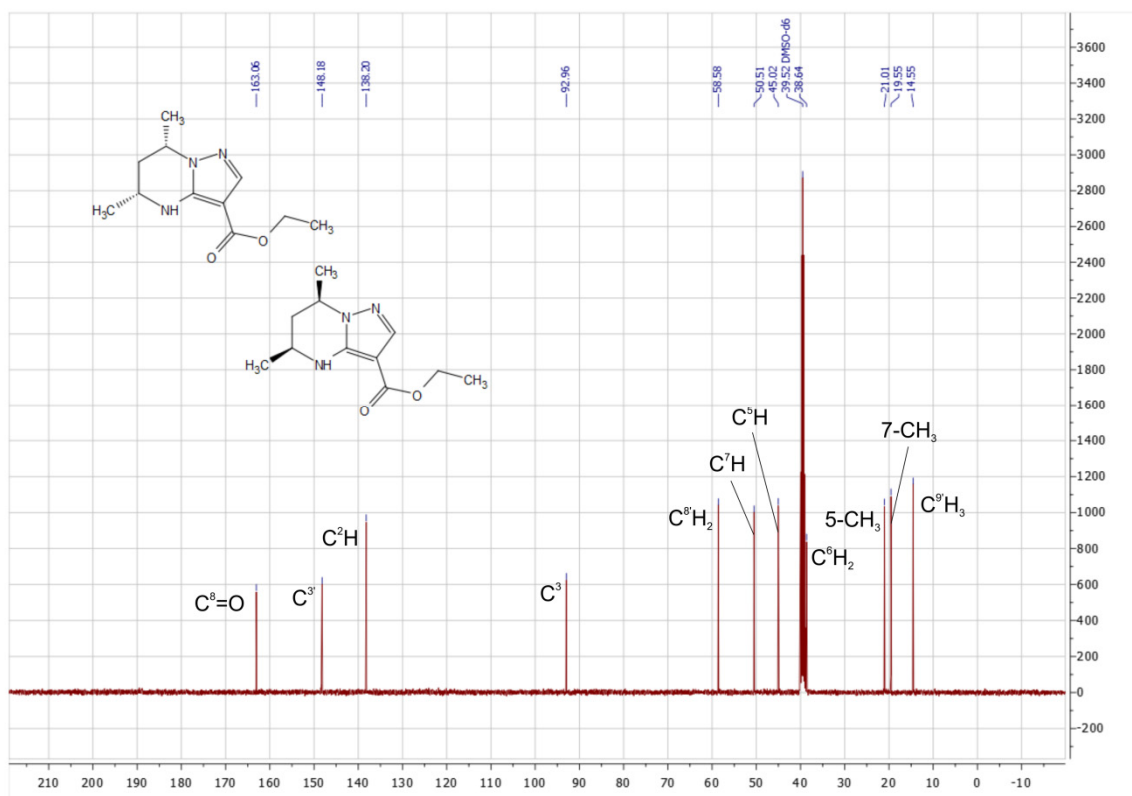

Figure S8.  $^{13}\text{C}$  NMR spectrum of **6b** (SYN).

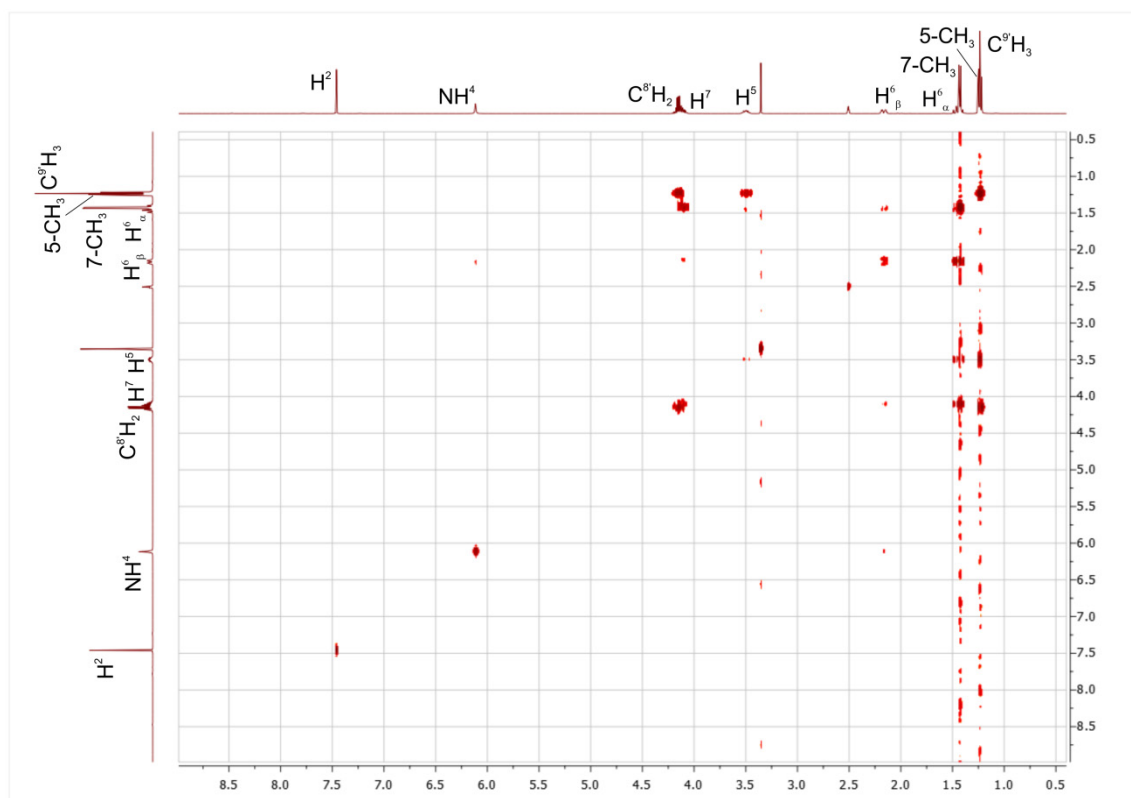

Figure S9. COSY spectrum of **6b** (SYN).

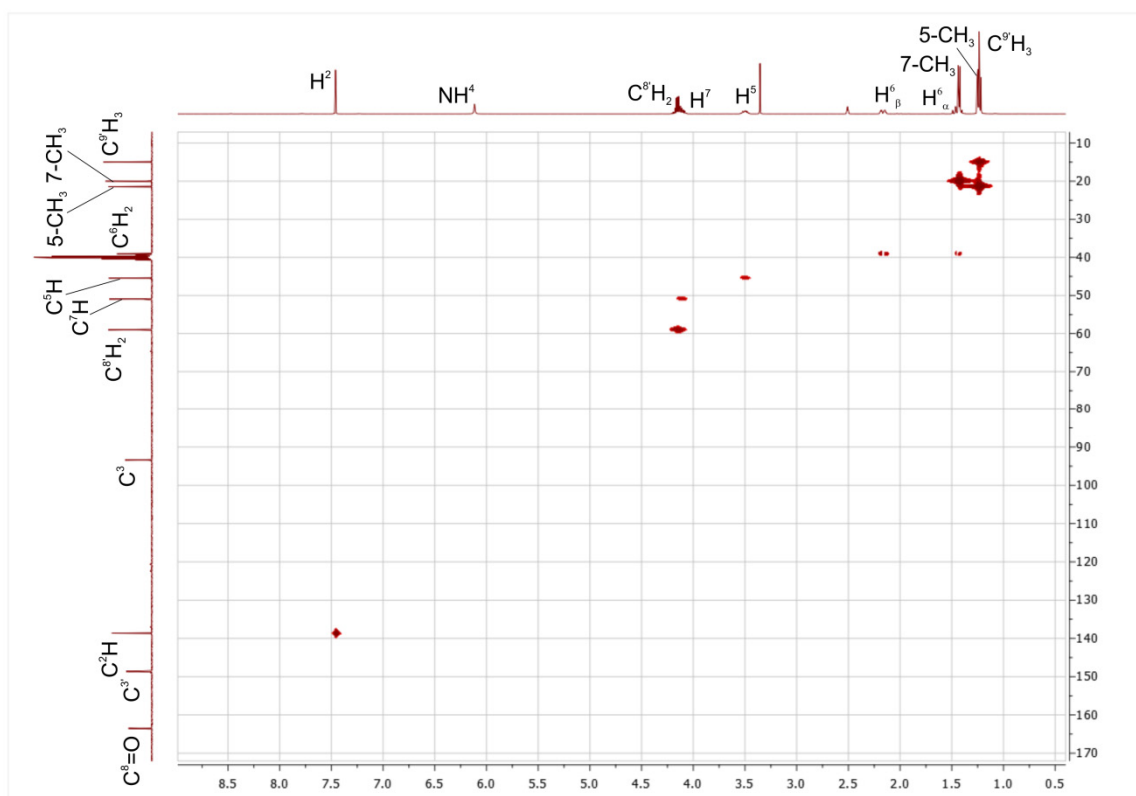

Figure S10. HSQC spectrum of **6b** (SYN).

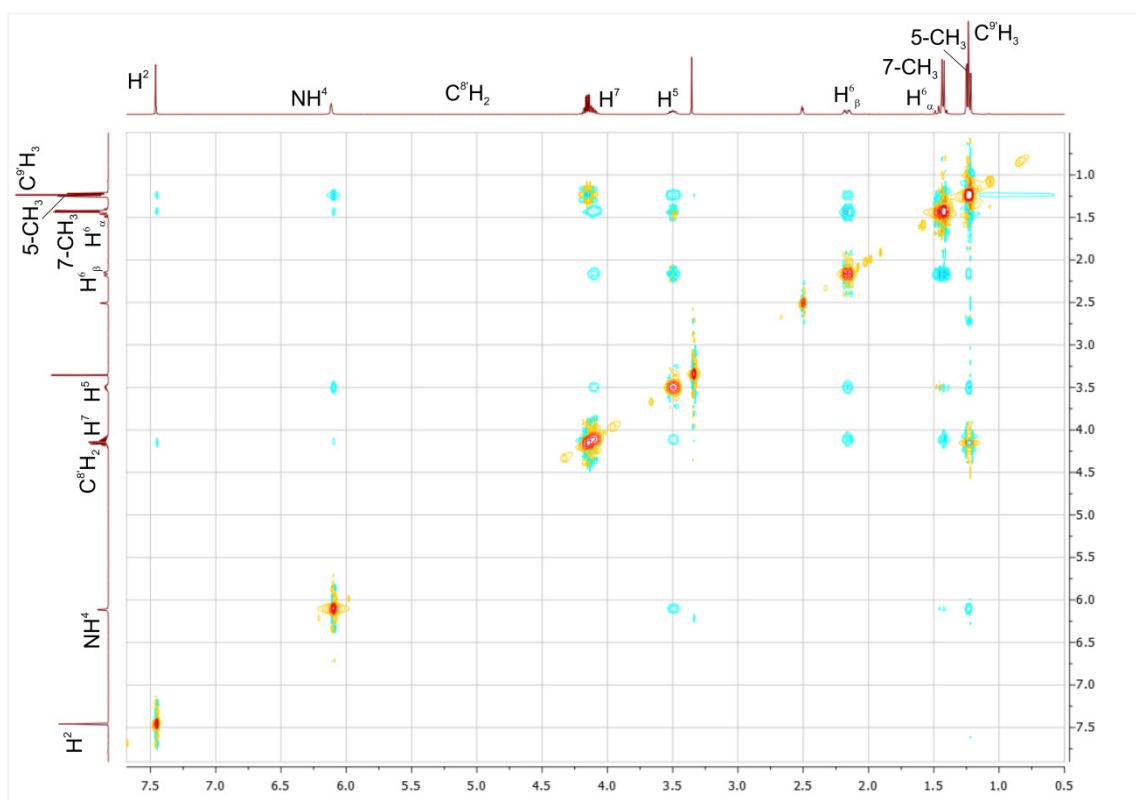

Figure S11. NOESY spectrum of **6b** (SYN).

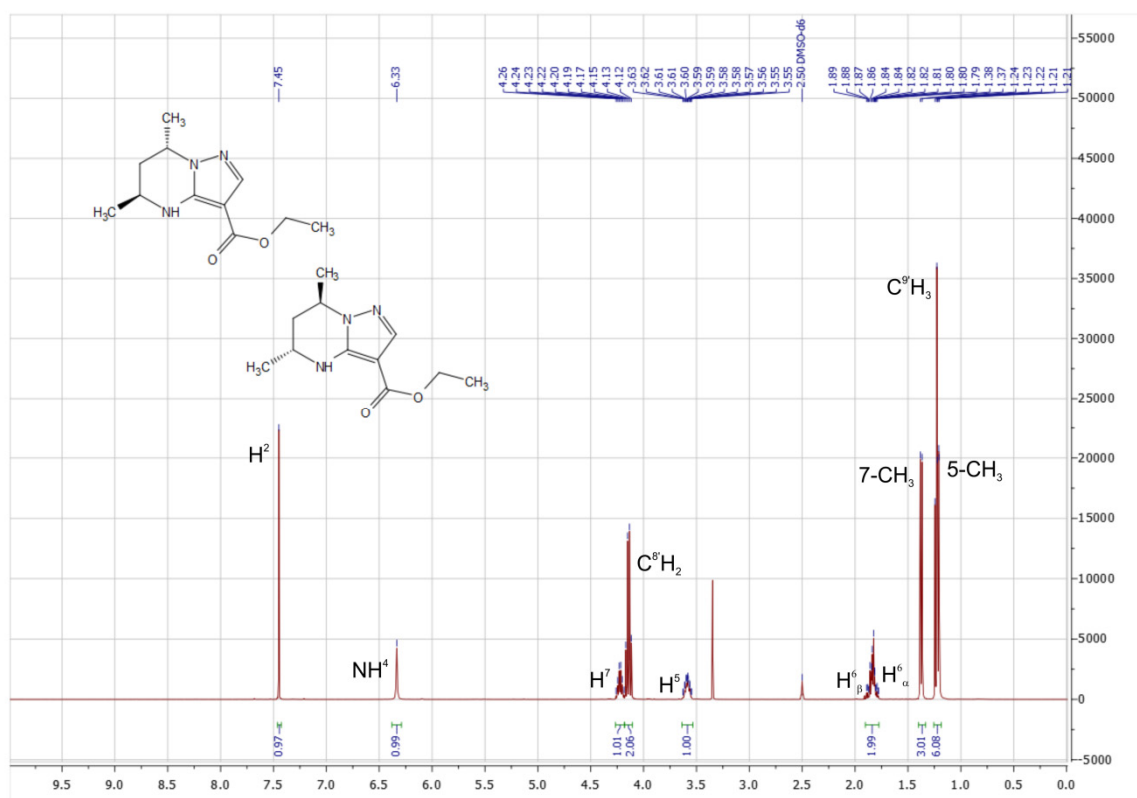

Figure S12.  $^1\text{H}$  NMR spectrum of **7b** (ANTI).

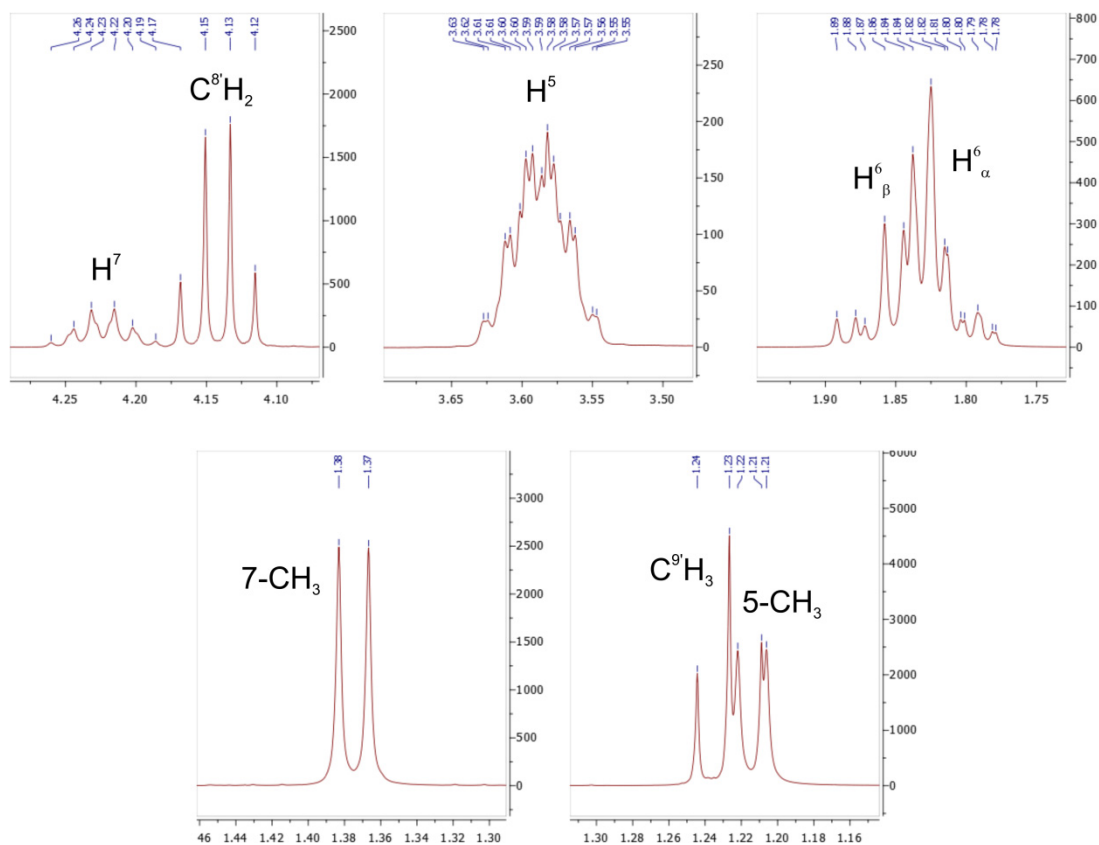

Figure S13. Magnified non-singlet signals in  $^1\text{H}$  NMR spectrum of **7b** (ANTI).



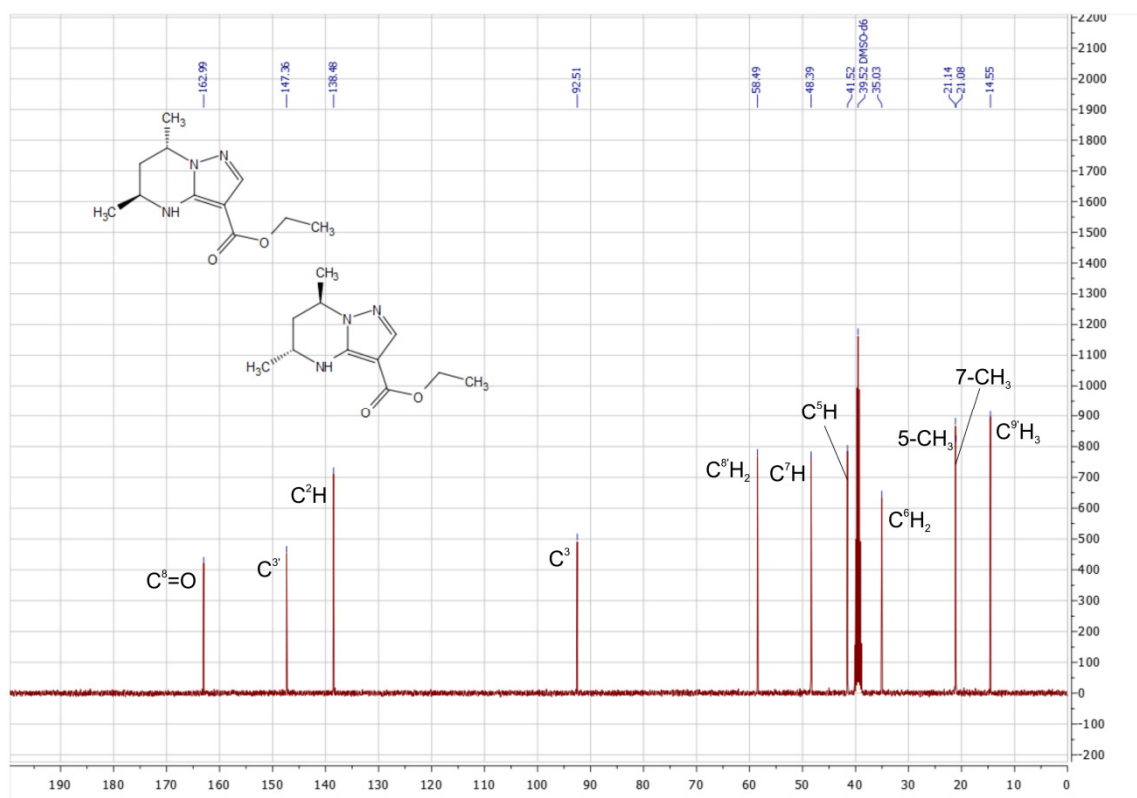

**Figure S14.** <sup>13</sup>C NMR spectrum of **7b** (ANTI).

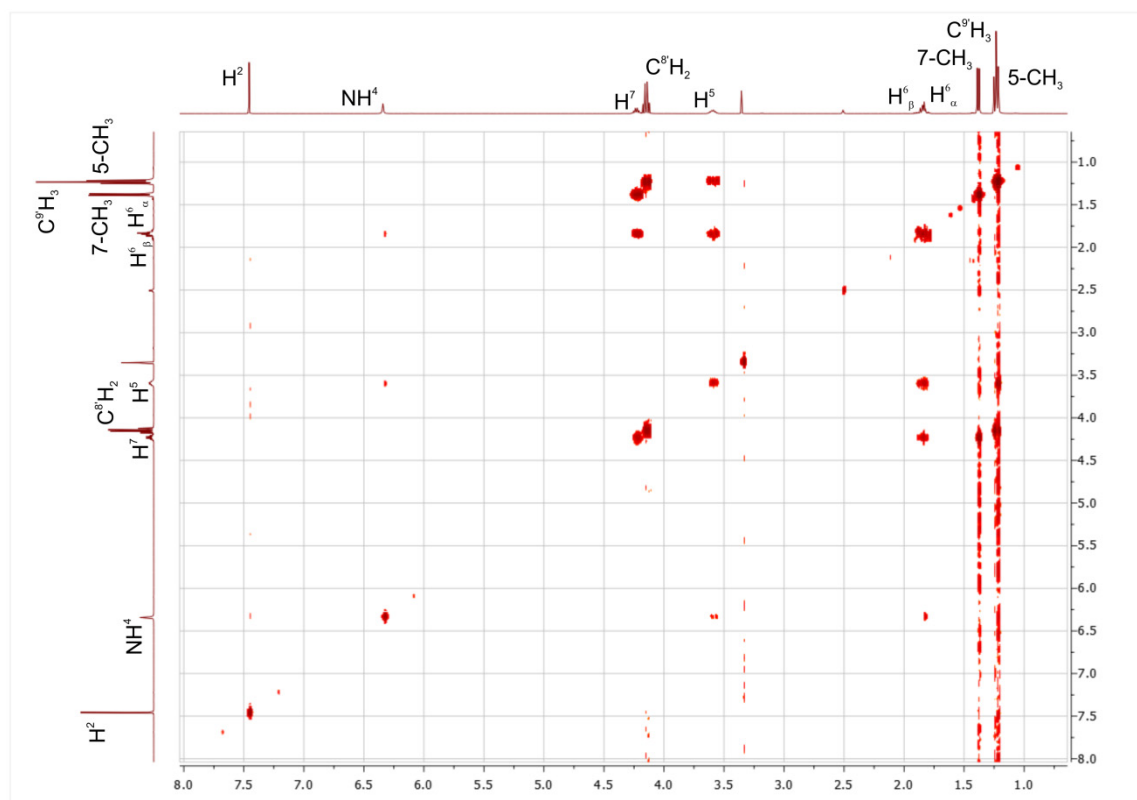

**Figure S15.** COSY spectrum of **7b** (ANTI).

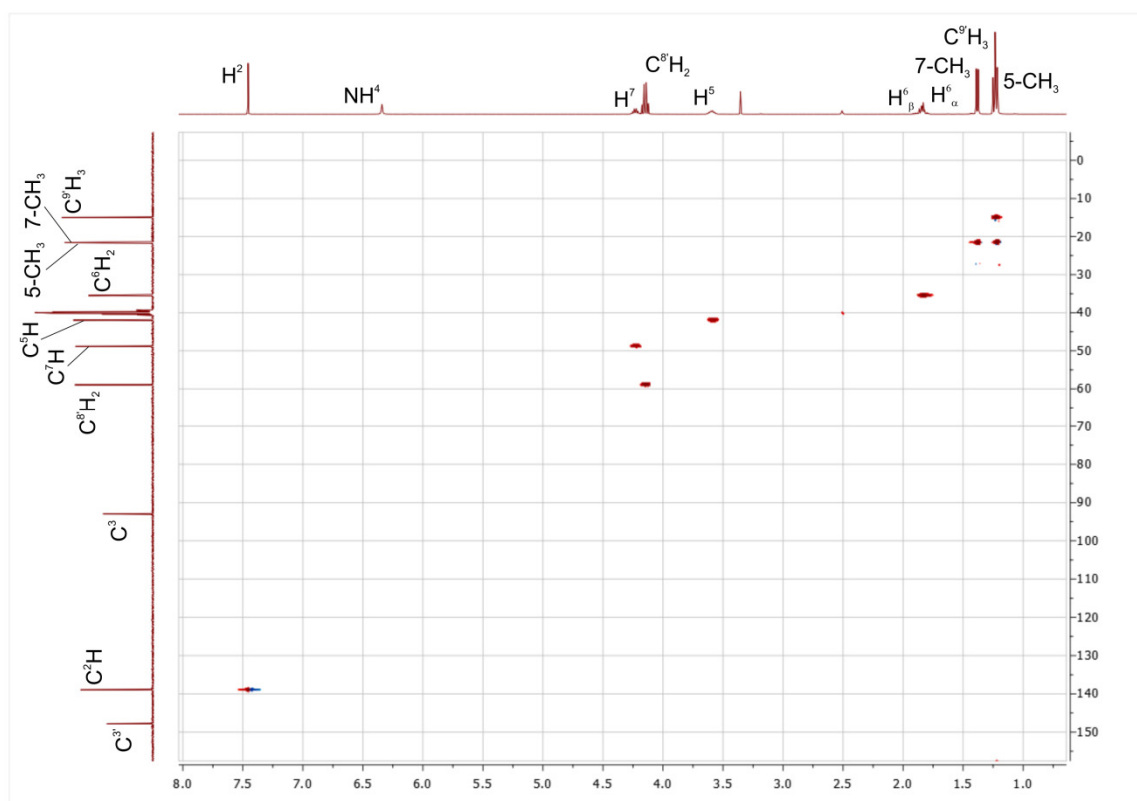

Figure S16. HSQC spectrum of **7b** (ANTI).

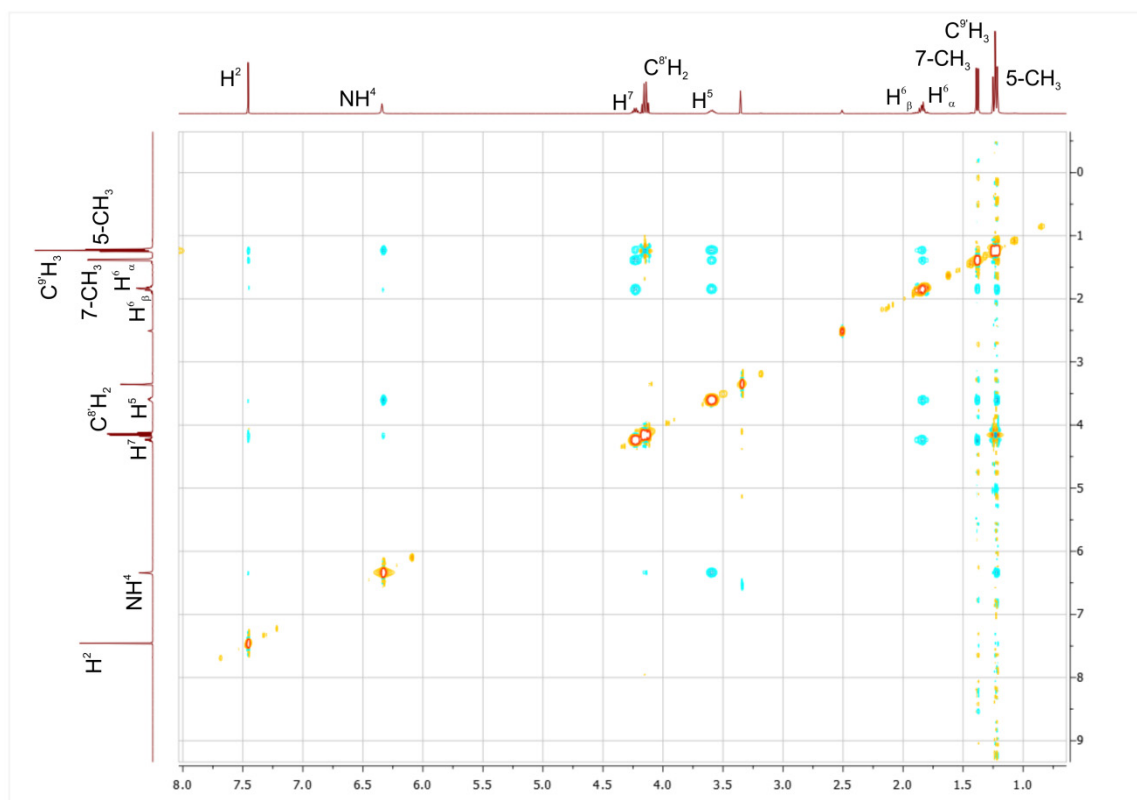

Figure S17. NOESY spectrum of **7b** (ANTI).

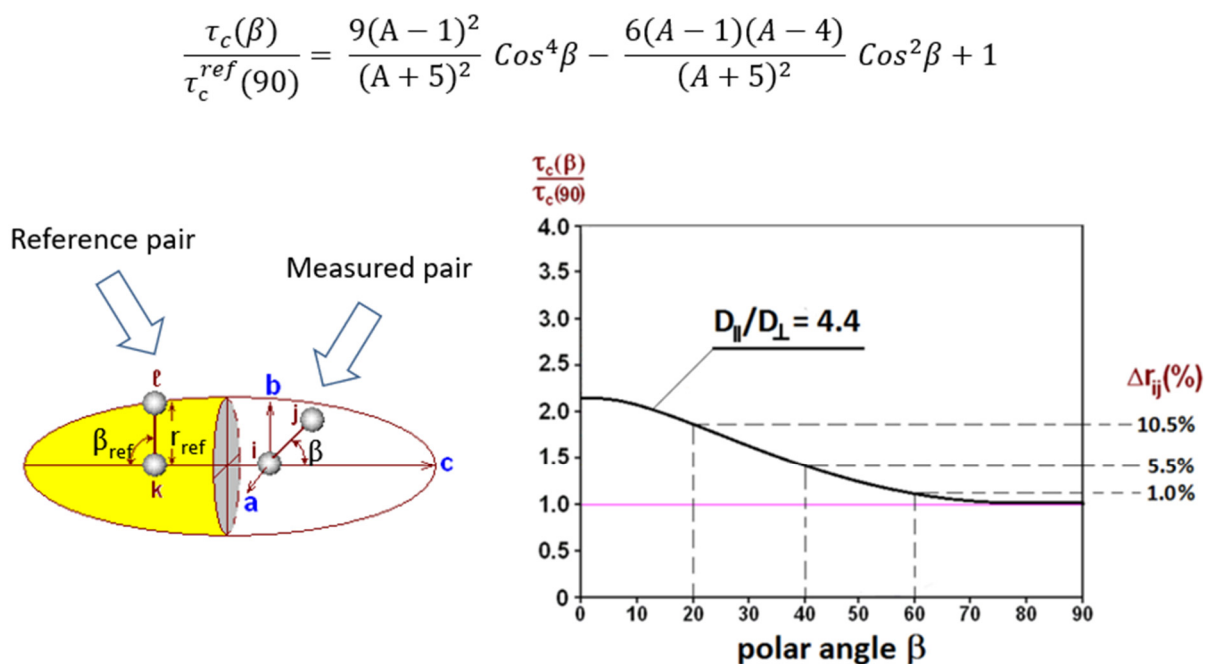

**Figure S18.** Illustration of estimating the contribution of diffusion anisotropy (in %) to measured distances at the diffusion anisotropy parameter  $A = 4.4$  for **6b** (SYN).

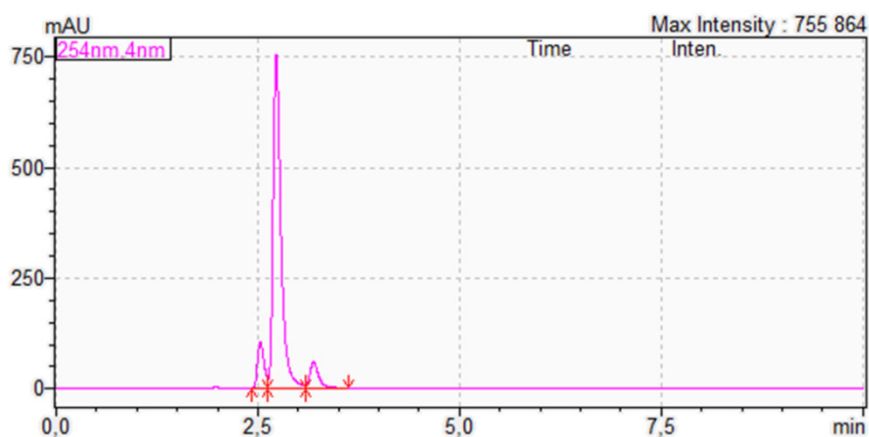

| Peak  | Compound  | Ret. Time | Area    | Area %  | Height | Height % |
|-------|-----------|-----------|---------|---------|--------|----------|
| 1     | <b>7a</b> | 2.530     | 604083  | 9.737   | 104058 | 11.350   |
| 2     | <b>6a</b> | 2.728     | 5149722 | 83.005  | 752580 | 82.086   |
| 3     | <b>5a</b> | 3.189     | 450284  | 7.258   | 60187  | 6.565    |
| Total |           |           | 6204089 | 100.000 | 916825 | 100.000  |

**Figure S19.** HPLC analysis of product mixture obtained from reduction of **4a** in methanol.

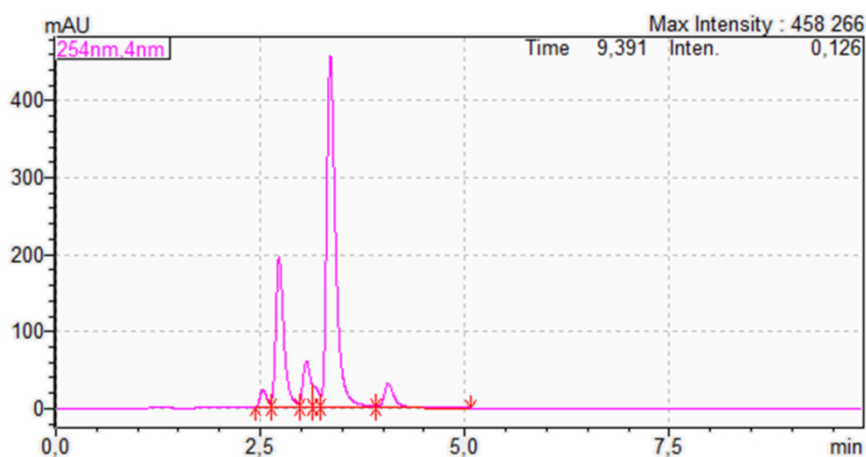

| Peak  | Compound  | Ret. Time | Area    | Area %  | Height | Height % |
|-------|-----------|-----------|---------|---------|--------|----------|
| 1     | <b>7a</b> | 2.531     | 143894  | 2.473   | 23273  | 2.927    |
| 2     | <b>6a</b> | 2.728     | 1351788 | 23.233  | 195161 | 24.547   |
| 3     | <b>7b</b> | 3.063     | 372462  | 6.401   | 60191  | 7.571    |
| 4     | <b>5a</b> | 3.145     | 143934  | 2.474   | 28461  | 3.580    |
| 5     | <b>6b</b> | 3.356     | 3519322 | 60.485  | 456376 | 57.403   |
| 6     | <b>5b</b> | 4.064     | 287102  | 4.934   | 31575  | 3.972    |
| Total |           |           | 5818504 | 100.000 | 795038 | 100.000  |

Figure S20. HPLC analysis of product mixture obtained from reduction of **4b** in methanol.

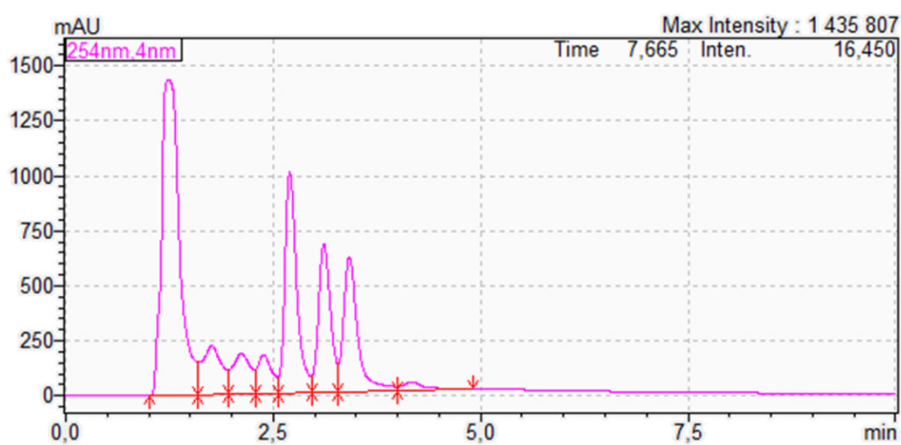

| Peak  | Compound  | Ret. Time | Area     | Area %  | Height  | Height % |
|-------|-----------|-----------|----------|---------|---------|----------|
| 1     | unknown   | 1.238     | 21717258 | 39.401  | 1434068 | 32.997   |
| 2     | unknown   | 1.760     | 3652129  | 6.626   | 221882  | 5.105    |
| 3     | unknown   | 2.116     | 2706158  | 4.910   | 185161  | 4.260    |
| 4     | unknown   | 2.384     | 2083826  | 3.781   | 175440  | 4.037    |
| 5     | <b>4b</b> | 2.699     | 9998134  | 18.139  | 1006105 | 23.150   |
| 6     | <b>7b</b> | 3.111     | 6941361  | 12.593  | 673831  | 15.504   |
| 7     | <b>6b</b> | 3.417     | 7280848  | 13.209  | 609976  | 14.035   |
| 8     | unknown   | 4.162     | 739122   | 1.341   | 39583   | 0.911    |
| Total |           |           | 55118835 | 100.000 | 4346045 | 100.000  |

Figure S21. HPLC analysis of reaction mixture from reduction of **4b** in chloroform.

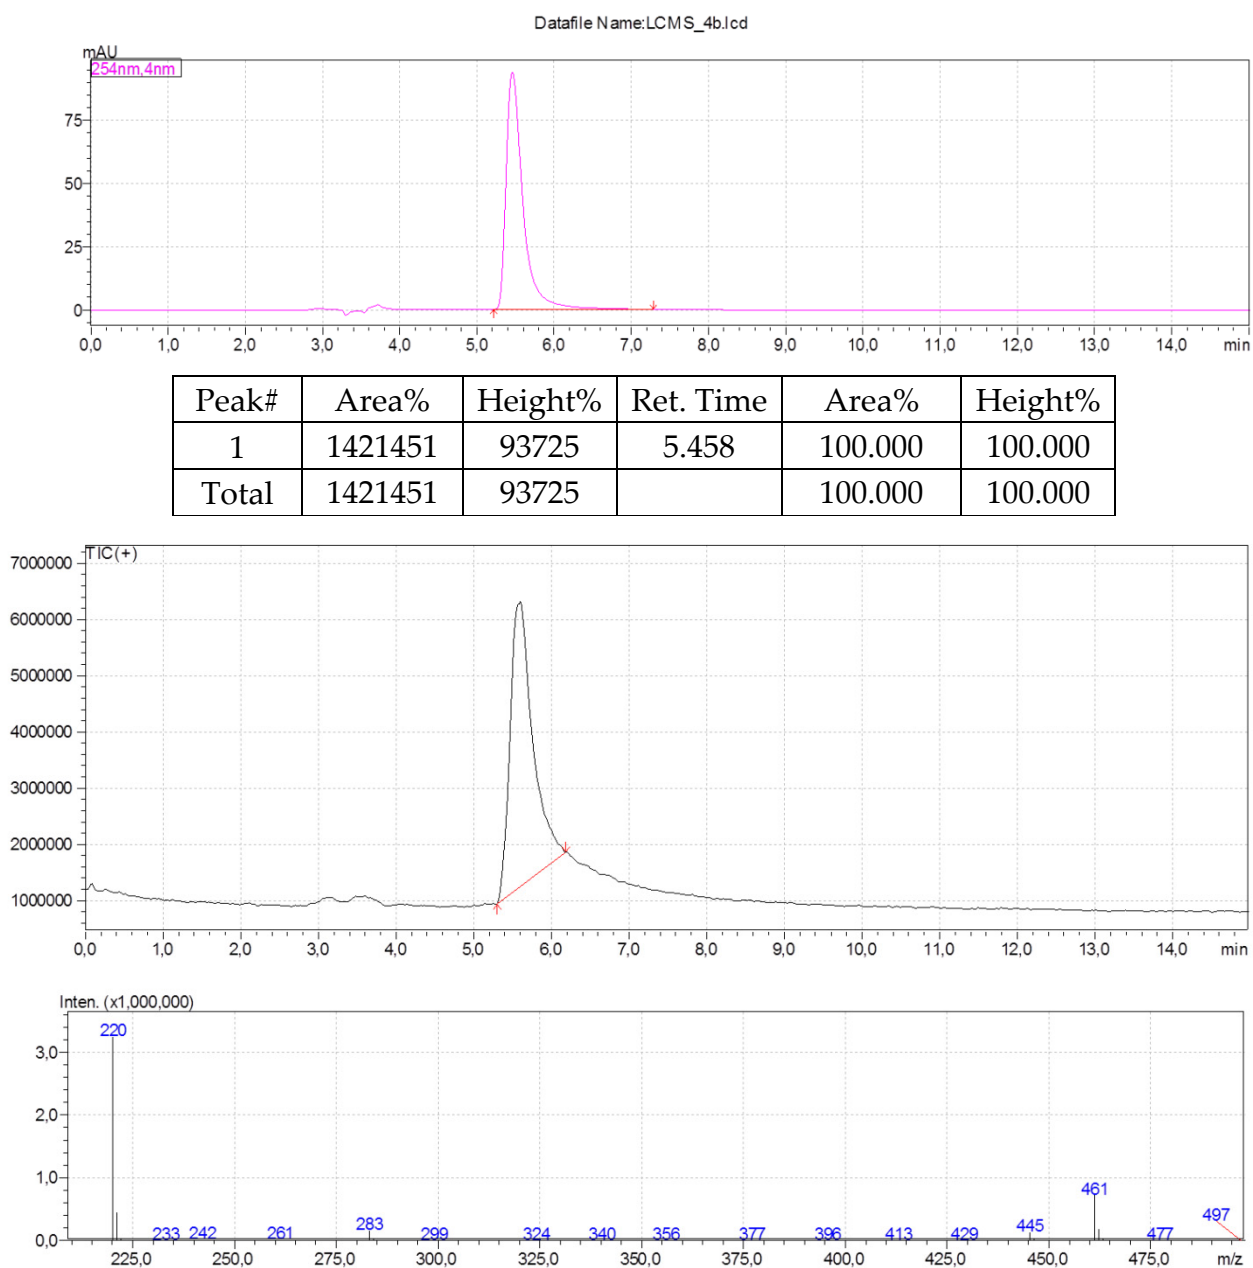

Raw Spectrum: [5.583 → 5.617]; Background: [5.300 → 6.183]; Base Peak: m/z 220.20

| Peak# | m/z    | Absolute In-<br>tensity | Relative In-<br>tensity |
|-------|--------|-------------------------|-------------------------|
| 1     | 220.20 | 3252229                 | 100.00                  |
| 2     | 461.30 | 726357                  | 22.33                   |
| 3     | 221.20 | 448220                  | 13.78                   |
| 4     | 462.35 | 179505                  | 5.52                    |
| 5     | 283.15 | 165093                  | 5.08                    |
| 6     | 445.30 | 133355                  | 4.10                    |
| 7     | 222.20 | 38929                   | 1.20                    |
| 8     | 446.35 | 34725                   | 1.07                    |

Figure S22. LCMS data of 4b.

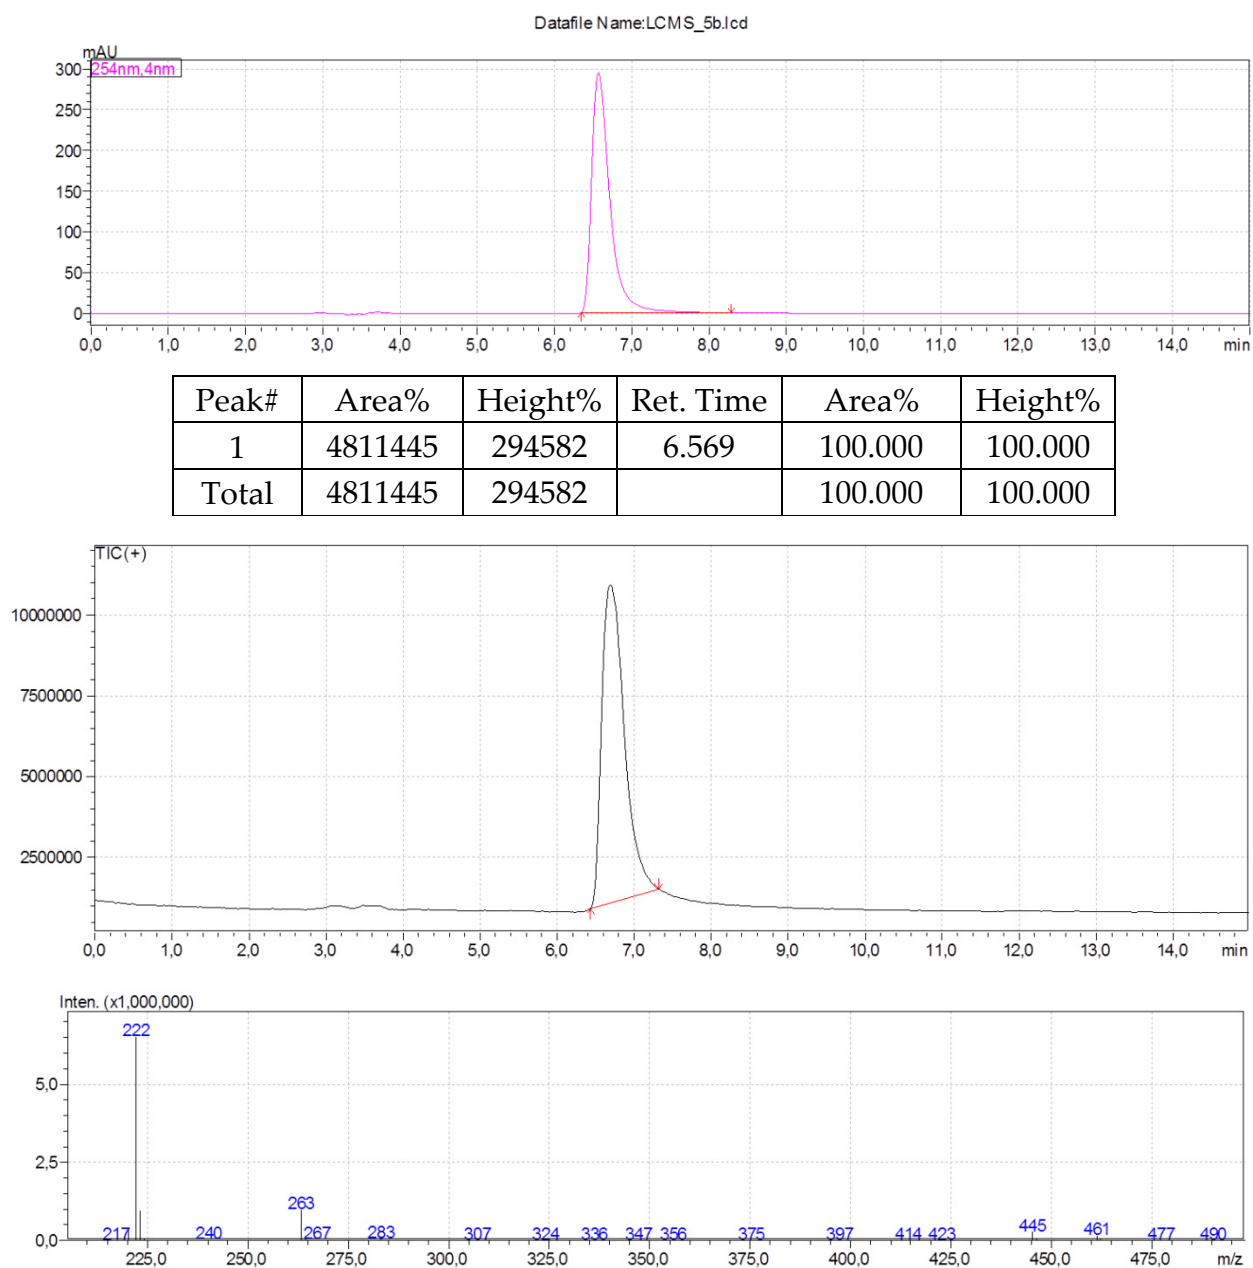

Raw Spectrum: [6.683 → 6.717]; Background: [6.433 → 7.317]; Base Peak: m/z 222.20

| Peak# | m/z    | Absolute In-<br>tensity | Relative In-<br>tensity |
|-------|--------|-------------------------|-------------------------|
| 1     | 222.20 | 6531952                 | 100.00                  |
| 2     | 263.20 | 989592                  | 15.15                   |
| 3     | 223.25 | 968996                  | 14.83                   |
| 4     | 220.20 | 341758                  | 5.23                    |
| 5     | 445.30 | 282483                  | 4.32                    |
| 6     | 461.30 | 158200                  | 2.42                    |
| 7     | 264.25 | 154218                  | 2.36                    |
| 8     | 224.20 | 84418                   | 1.29                    |

Figure S23. LCMS data of 5b.

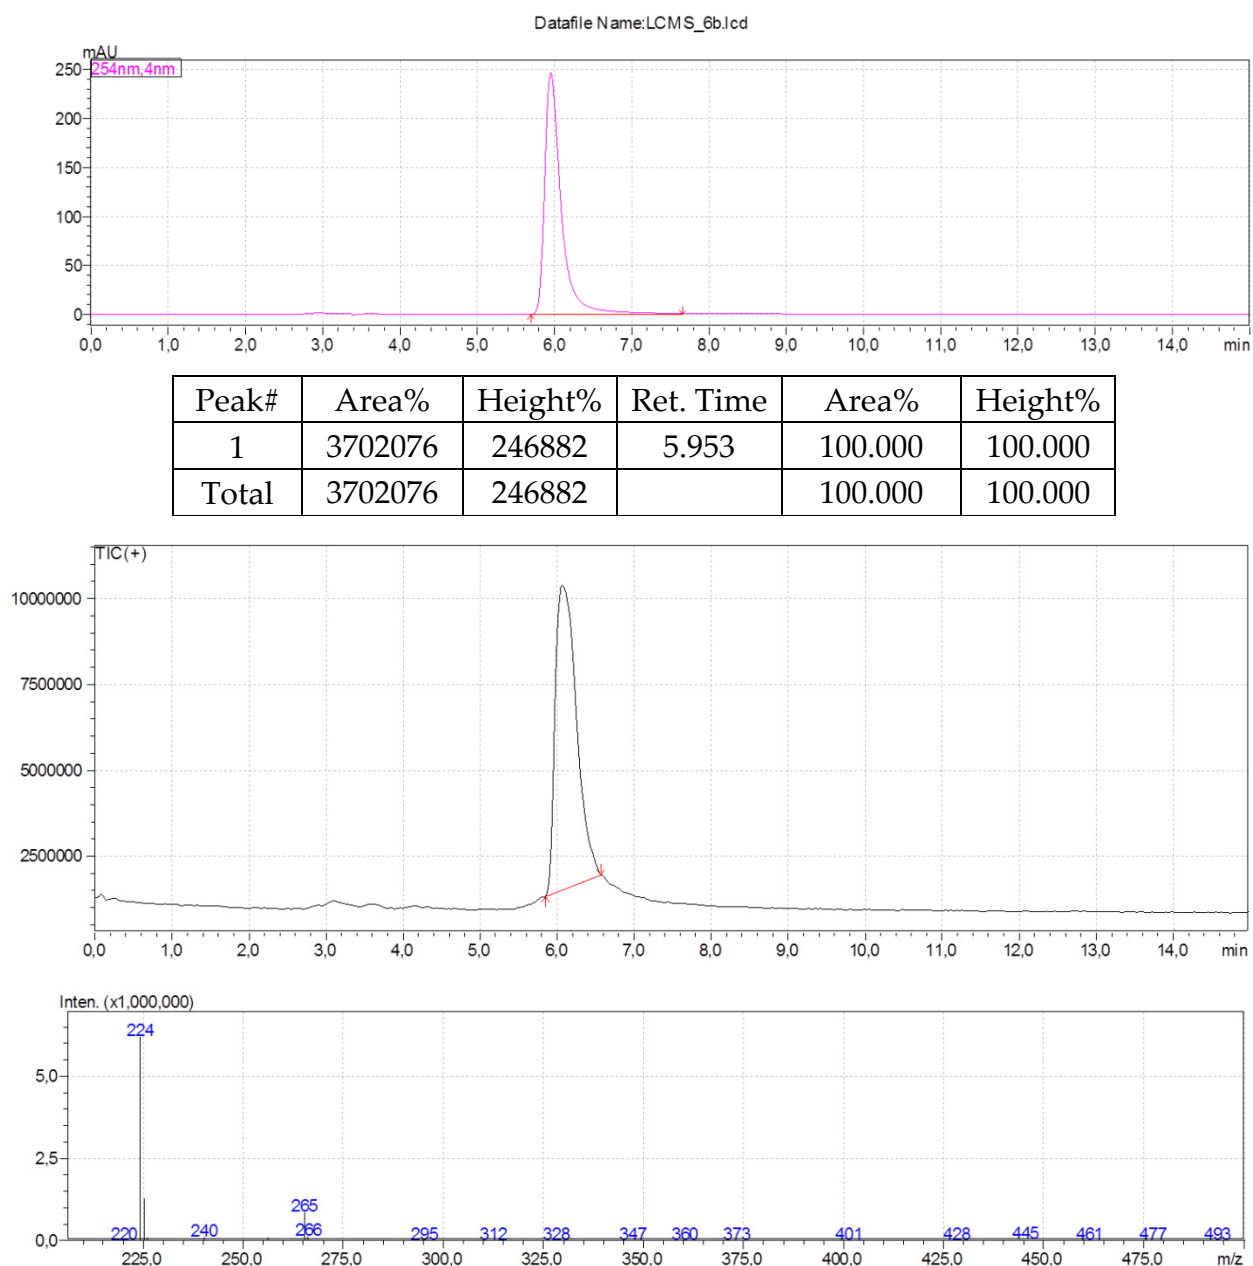

Raw Spectrum: [6.050 → 6.083]; Background: [5.850 → 6.567]; Base Peak: m/z 224.20

| Peak# | m/z    | Absolute In-<br>tensity | Relative In-<br>tensity |
|-------|--------|-------------------------|-------------------------|
| 1     | 224.20 | 6217046                 | 100.00                  |
| 2     | 225.20 | 1294927                 | 20.83                   |
| 3     | 265.25 | 862018                  | 13.87                   |
| 4     | 266.25 | 134097                  | 2.16                    |
| 5     | 226.20 | 109506                  | 1.76                    |
| 6     | 240.20 | 109623                  | 1.76                    |
| 7     | 256.20 | 107292                  | 1.73                    |

Figure S24. LCMS data of **6b** (SYN).

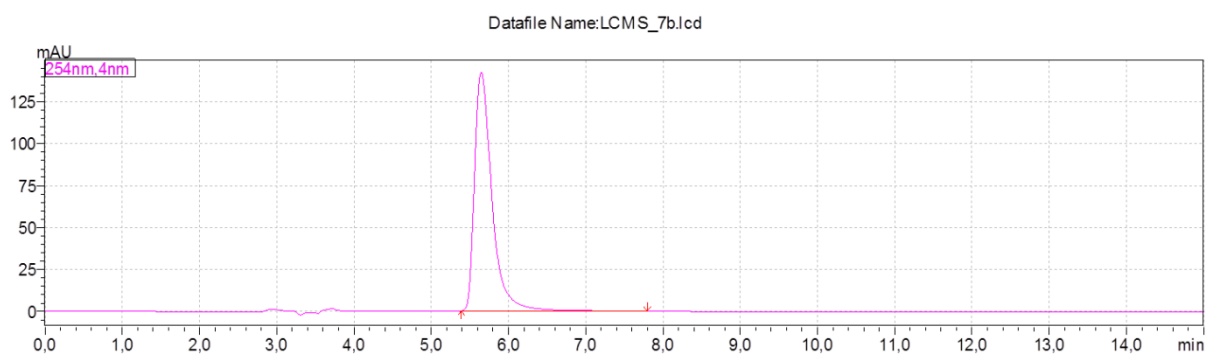

| Peak# | Area%   | Height% | Ret. Time | Area%   | Height% |
|-------|---------|---------|-----------|---------|---------|
| 1     | 2522619 | 142061  | 5.647     | 100.000 | 100.000 |
| Total | 2522619 | 142061  |           | 100.000 | 100.000 |

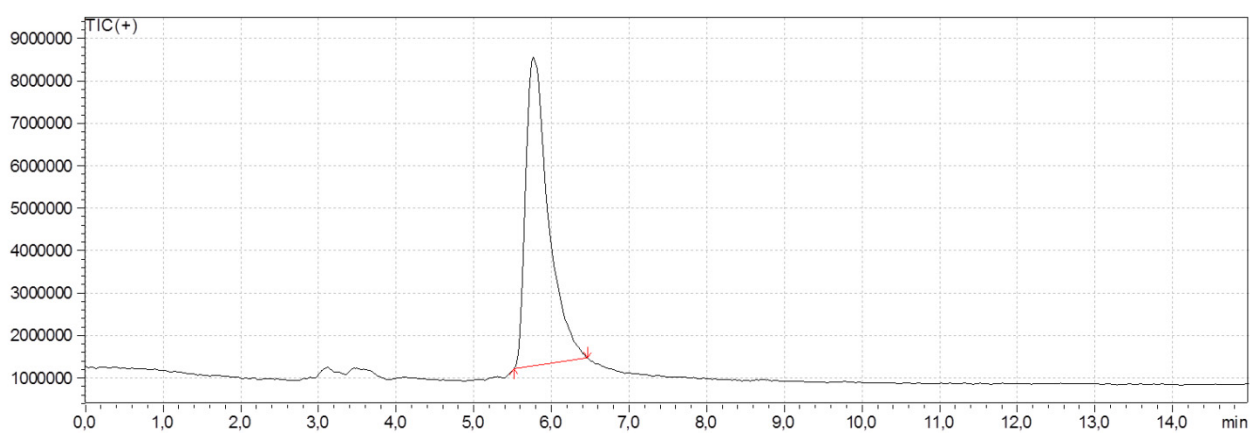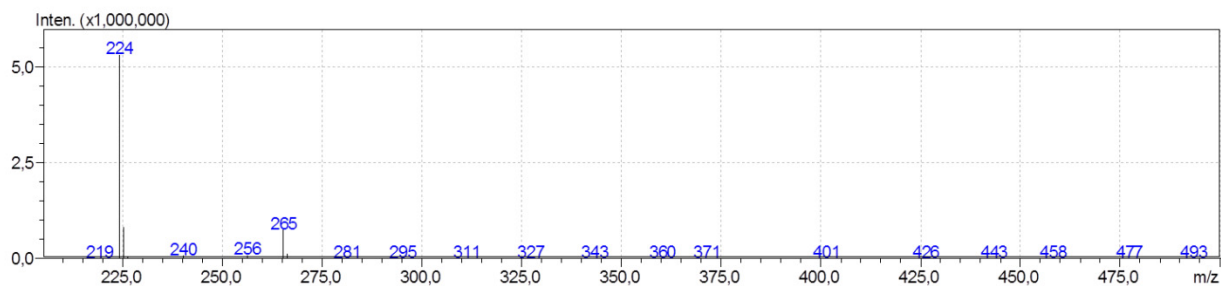

Raw Spectrum: [5.750 → 5.783]; Background: [5.517 → 6.467]; Base Peak: m/z 224.20

| Peak# | m/z    | Absolute In-<br>tensity | Relative In-<br>tensity |
|-------|--------|-------------------------|-------------------------|
| 1     | 224.20 | 5333542                 | 100.00                  |
| 2     | 225.20 | 827126                  | 15.51                   |
| 3     | 265.25 | 753995                  | 14.14                   |
| 4     | 266.25 | 118885                  | 2.23                    |
| 5     | 256.20 | 86602                   | 1.62                    |
| 6     | 240.20 | 78722                   | 1.48                    |
| 7     | 226.20 | 71559                   | 1.34                    |

Figure S25. LCMS data of **7b** (ANTI).
